# Supplementary material
Source: Springer Nature journal article supplement (https://www.springermedizin.de/resource/supplementary/12936_2011_1918_MOESM16_ESM.pdf/9541982)
Supplement: MOESM16 [file 9541982]

Proportion (%)

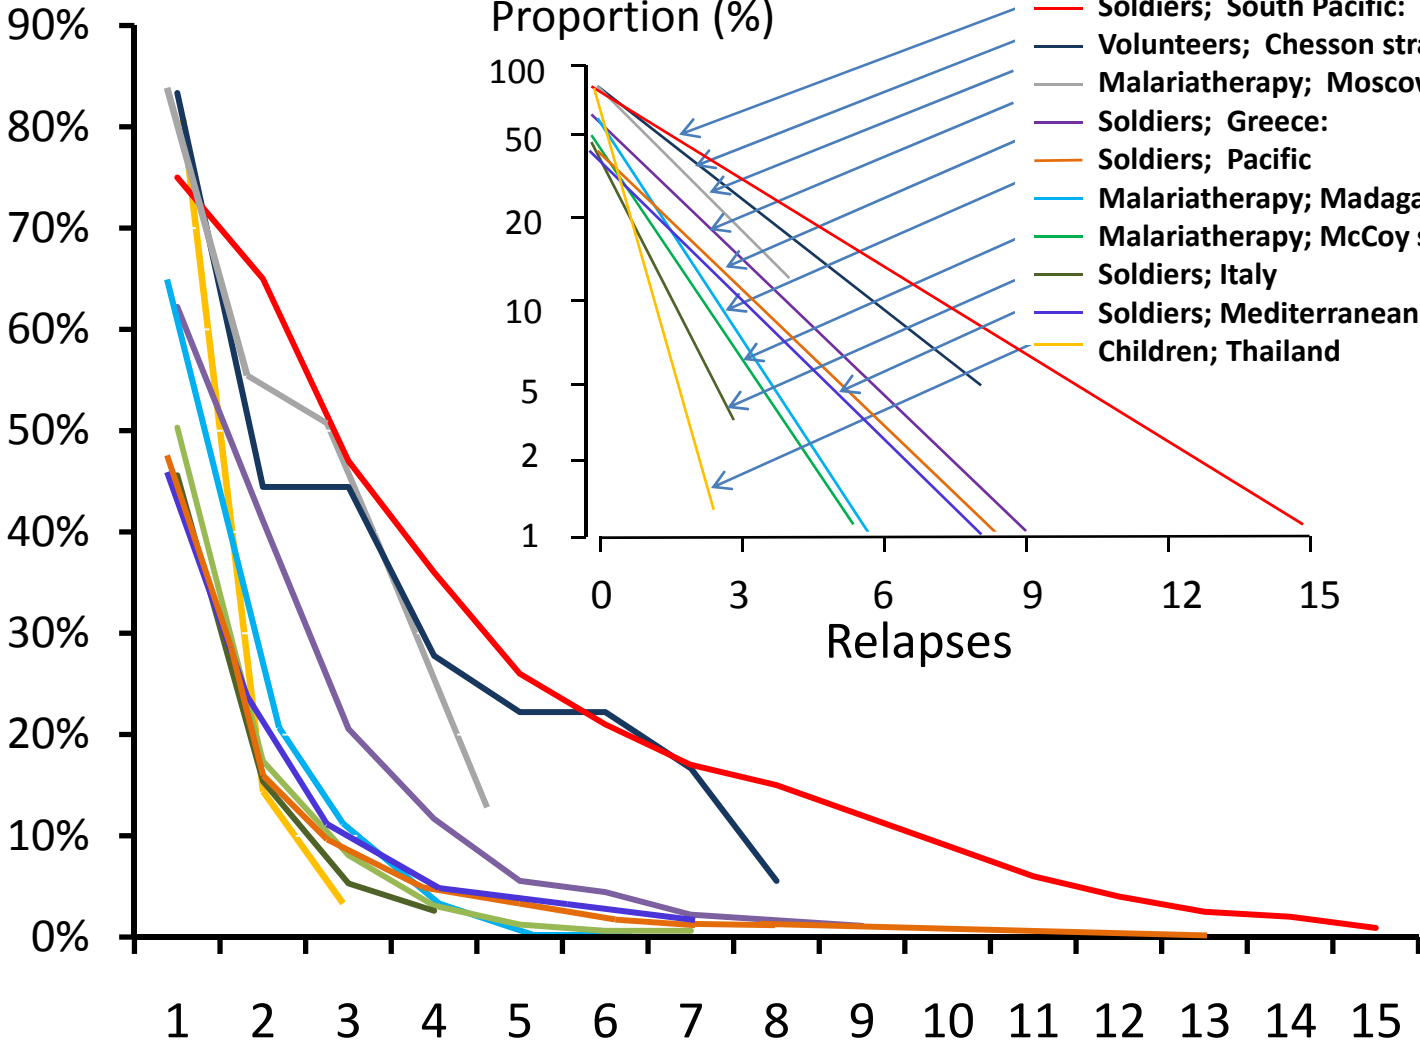

Proportion (%)

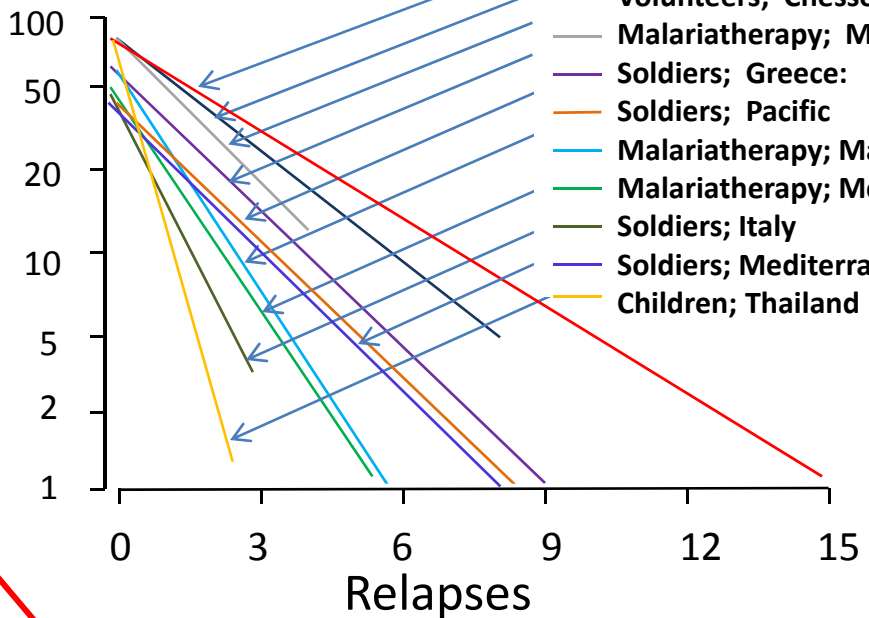

- Soldiers; South Pacific: N = 222
- Volunteers; Chesson strain N = 18
- Malariatherapy; Moscow N = 64
- Soldiers; Greece: N = 180
- Soldiers; Pacific N = 563
- Malariatherapy; Madagascar strain N = 161
- Malariatherapy; McCoy strain N = 149
- Soldiers; Italy N = 540
- Soldiers; Mediterranean N = 155
- Children; Thailand N = 602

Relapses
